# Supplementary material for: Co-precipitation synthesis and photoluminescence properties of BaTiF6:Mn4+: an efficient red phosphor for warm white LEDs
Source: Royal Society of Chemistry journal article supplement (doi:10.1039/c7tc04196a), 2017-11-24
Supplement: c7tc04196a1.pdf [file c7tc04196a1.pdf]

## Supporting Information

### Co-precipitation synthesis and photoluminescence properties of BaTiF<sub>6</sub>:Mn<sup>4+</sup>: an efficient red phosphor for warm white LEDs

Yong Liu,<sup>a</sup> Guojun Gao,<sup>b</sup> Lin Huang,<sup>a</sup> Yiwen Zhu,<sup>a</sup> Xuejie Zhang,<sup>a</sup> Jinbo Yu,<sup>a</sup> Bryce S. Richards,<sup>b,c</sup>  
Tongtong Xuan,<sup>a</sup> Zhengliang Wang<sup>\*d</sup> and Jing Wang<sup>\*a</sup>

<sup>a</sup>Ministry of Education Key Laboratory of Bioinorganic and Synthetic Chemistry, State Key Laboratory of Optoelectronic Materials and Technologies, School of Chemistry, School of Materials Science and Engineering, Sun Yat-Sen University, Guangzhou, 510275, P. R. China.

\*E-mail: ceswj@mail.sysu.edu.cn

<sup>b</sup>Institute of Microstructure Technology, Karlsruhe Institute of Technology (KIT), Hermann-von-Helmholtz-Platz 1, 76344 Eggenstein-Leopoldshafen, Germany

<sup>c</sup>Light Technology Institute, Karlsruhe Institute of Technology, Engesserstrasse 13, 76131 Karlsruhe, Germany

<sup>d</sup>Key Laboratory of Comprehensive Utilization of Mineral Resources in Ethnic Regions, Joint Research Centre for International Cross-border Ethnic Regions Biomass Clean Utilization in Yunnan, School of Chemistry & Environment, Yunnan Minzu University, Kunming, 650500, P. R. China, \*E-mail: wangzhengliang@foxmail.com

#### Synthesis of BaTiF<sub>6</sub>: Mn<sup>4+</sup>

The red phosphor BaTi<sub>0.97</sub>F<sub>6</sub>: 0.03Mn<sup>4+</sup> samples were synthesized through a hydrothermal route. The specific process is as follows: firstly, 2.5 mmol of TiO<sub>2</sub>, 2.5 mmol of BaF<sub>2</sub> and 0.075 mmol of K<sub>2</sub>MnF<sub>6</sub> were added into a solution containing 5 mL of HF (40% wt). secondly, the mixed solution was stirred for 10 min and then transferred into an 10 mL of Teflon lined autoclave. The autoclave was maintained at 120 °C for 15 h. As the autoclave was cooled to room temperature naturally, the final products were washed three times with ethanol. At last, the product was dried at 80 °C for 2 h.

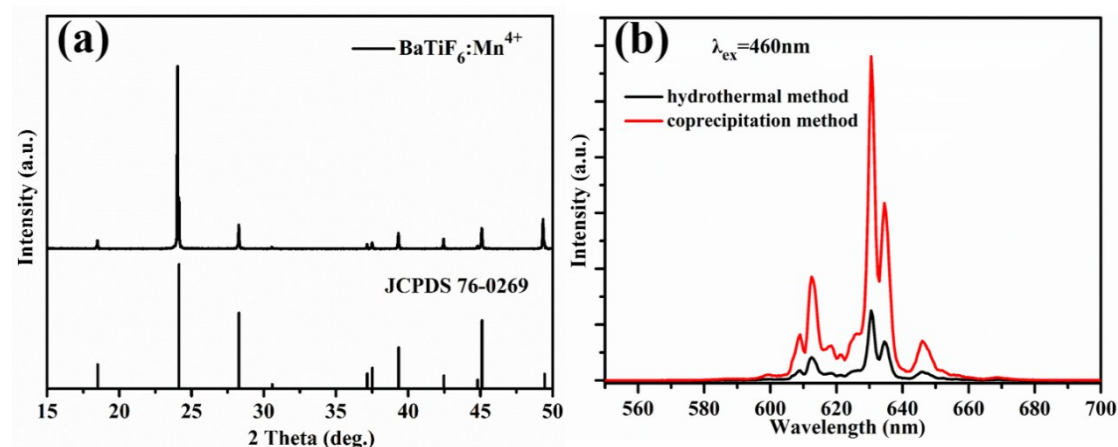

**Fig. S1.** (a) XRD pattern of the red phosphors BaTi<sub>0.97</sub>F<sub>6</sub>:0.03Mn<sup>4+</sup> by hydrothermal method at 150 °C for 12 h and (b) PL ( $\lambda_{\text{ex}} = 460 \text{ nm}$ ) spectra of the red phosphors BaTi<sub>0.97</sub>F<sub>6</sub>:0.03Mn<sup>4+</sup> by hydrothermal method (black line) and coprecipitation method (red line).

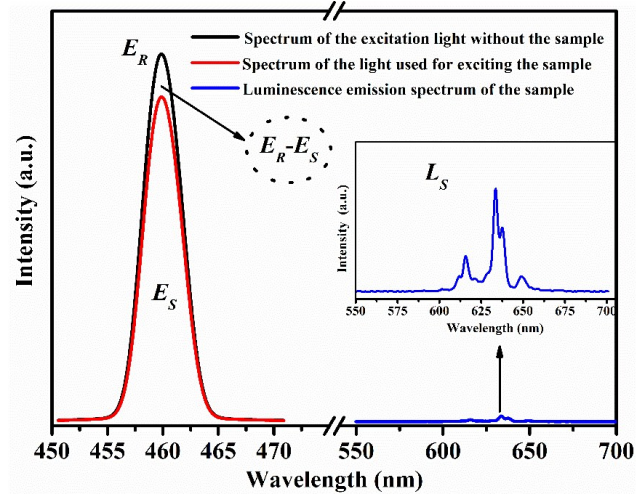

**Fig. S2** Spectrum of the excitation light without the BaTi<sub>0.97</sub>F<sub>6</sub>:0.03Mn<sup>4+</sup> sample ( $E_R$ ), spectrum of the light used for exciting the BaTi<sub>0.97</sub>F<sub>6</sub>:0.03Mn<sup>4+</sup> sample ( $E_S$ ), luminescence emission spectrum of the BaTi<sub>0.97</sub>F<sub>6</sub>:0.03Mn<sup>4+</sup> sample ( $L_S$ ), and the inset shows a magnification of the emission spectrum.

Note: QE is defined as the ratio of the number of emitted photons ( $I_{em}$ ) to the number of absorbed photons ( $I_{abs}$ ), and can be calculated by the following equation:

$$IQE = \frac{I_{em}}{I_{abs}} = \frac{\int L_S}{\int E_R - \int E_S}$$

where  $E_R$  is the spectrum of the excitation light without the sample in the sphere,  $E_S$  is the spectrum of the light used for exciting the sample, and  $L_S$  is the luminescence emission spectrum of the sample.

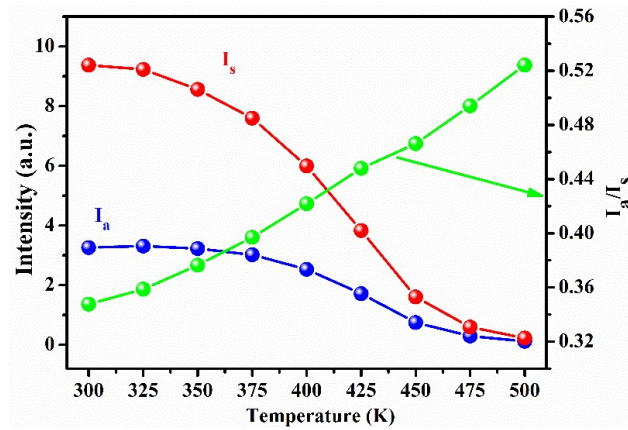

**Fig. S3** The temperature-dependent PL intensity of the as-synthesized BaTi<sub>0.97</sub>F<sub>6</sub>:0.03Mn<sup>4+</sup> in the wavelength ranges of 605–623 nm ( $I_a$ ), and 623–655 nm ( $I_s$ ).
